# Supplementary material
Source: PubMed Central journal article supplement (PMC5789958)
Supplement: pnas.1719988115.sapp.pdf [file pnas.1719988115.sapp.pdf]

## SUPPLEMENTARY MATERIALS

### **Fig. S1. Increased MH usage in normalized S $\mu$ -S $\gamma$ 1 and S $\mu$ -S $\epsilon$ CSR junctions from DSBR factors-deficient primary B cells**

Libraries from three replicates of each genotype were selected and randomly normalized to the smallest number of S $\mu$ -S $\gamma$ 1 or S $\mu$ -S $\epsilon$  junctions recovered among all libraries before calculating MH patterns. **(A and D)** MH usage from junctions with direct and up to 10 bp MH for 5'S $\mu$  to S $\gamma$ 1 **(A)** and to S $\epsilon$  **(D)** DSBs are plotted as percentage of total junctions. **(B-C and E-F)** Percentages of direct joins of 5'S $\mu$  to S $\gamma$ 1 **(B)** and S $\epsilon$  **(E)** and junctions with 4bp or longer MH in S $\gamma$ 1 **(C)** or S $\epsilon$  **(F)** in different genetic backgrounds are compared. Unpaired two-tailed t-test was used to calculate  $p$  values for significant difference between samples (Quantitative data = average  $\pm$  s.e.m., \*  $p \leq 0.05$ , \*\*  $p \leq 0.01$ , \*\*\*  $p \leq 0.001$ ).

### **Fig. S2. Increased MH usage during S region DSB joining in H2AX- and Rif1-deficient activated primary B cells**

Primary spleen B cells from wild type,  $H2AX^{-/-}$  and  $RIF1^{lox/lox} CD19^{Cre/+}$  were stimulated with  $\alpha$ CD40/IL4 for 96 hours and assayed as described in Fig.1. Wild type,  $H2AX^{-/-}$  cells are in 129S background and  $RIF1^{lox/lox} CD19^{Cre/+}$  cells in BL6 background that has very similar S $\epsilon$  sequences to that of 129S strains but different length for S $\gamma$ 1 and thus only analyzed for S $\epsilon$  junctions. **(A, D and G)** MH pattern of junctions of 5'S $\mu$  to S $\gamma$ 1 **(A)** and 5'S $\mu$  to S $\epsilon$  **(D, G)** breaks are plotted as percentage of total junctions. **(B-C, E-F and H-I)** Percentages of direct joins **(B, E, H)** and junctions with 4 bp and longer MH **(C, F, I)** of 5'S $\mu$  to S $\gamma$ 1 and S $\epsilon$  in different genetic backgrounds are compared. Unpaired two-tailed t-test was used to calculate  $p$  values for significant difference between samples (Quantitative data = average  $\pm$  s.e.m., \*\*  $p \leq 0.01$ , \*\*\*  $p \leq 0.001$ ). At least 3 independent samples were used for each experiment and details are in SI Appendix, Table S2.

**Fig. S3. Generation of ATM- and 53BP1-deficient CH12F3 cells and non-coding IgH allele S $\mu$ -S $\alpha$  region deleted CH12F3 cells with various genotypes.**

Two independent clones of ATM- and 53BP1-deficient CH12F3 cells were made using CRISPR-Cas9 mediated gene deletion. (A-D) Southern blot and western blot verification of ATM<sup>-/-</sup> clones (A, B) and 53BP1<sup>-/-</sup> clones (C, D) are shown. (E) Non-productive allele- S $\mu$ -S $\alpha$  region deleted WT, ATM-, 53BP1- and Ligase4-deficient CH12F3 cells were made using CRISPR-Cas9 mediated gene deletion. Southern blot verification of noncoding allele- S $\mu$ -S $\alpha$  region deleted clones is shown. (F) CH12F3 cells with non-productive allele- S $\mu$ -S $\alpha$  region deletion in WT, ATM<sup>-/-</sup>, 53BP1<sup>-/-</sup> and Ligase 4<sup>-/-</sup> backgrounds were stimulated with  $\alpha$ CD40/IL4/TGF- $\beta$  and assayed for IgA CSR 72 hrs post-stimulation. Each genotype has two independent clones and each clone has three experimental replicates. HTGTS libraries with genomic DNA harvested 72 hrs after stimulation were made with 5' S $\mu$  primer as described (1).

**Fig. S4. Distribution of junctions from S $\mu$  to S $\alpha$  in WT, ATM-, 53BP1-, Ligase 4-deficient clones with non-productive IgH allele S $\mu$ -S $\alpha$  region deletion**

(A) Non-productive allele- S $\mu$ -S $\alpha$  region deleted WT, ATM-, 53BP1- and Ligase 4-deficient CH12F3 cells were stimulated with  $\alpha$ CD40/IL4/TGF- $\beta$  for 3 days. Each genotype has two independent clones and each clone has three experimental replicates for the HTGTS with 5' S $\mu$  bait. All libraries were plotted linearly as percentage of junctions mapped to the 20 kb S $\alpha$  region as described previously (1). (B-C) Inversion (INV):deletion (DEL) bias ratio for S $\alpha$  junctions (B) and percentage of junctions with long resections (C) in various genotypes is shown. Unpaired two-tailed t-test was used to calculate *p* values for significant difference between samples which is shown in SI Appendix, Table S6-S7.

**Fig. S5. MH usage pattern for junctions between *c-myc*-Cas9 bait and S $\mu$  region**

(A) Data shown here is derived from libraries shown in Fig. 3. MH usage in translocation junctions from *c-myc*-Cas9 break joining to S $\mu$  breaks were plotted as percentage of junctions

with indicated length of MH over the total number of junctions in the region. **(B-C)** Percentages of direct joins **(B)** and joins with 4bp and longer MH **(C)** of *c-myc*-Cas9 break joining to  $S\mu$  breaks in different genetic backgrounds are shown. Statistical significance was calculated by two-tailed t test (Quantitative data = average  $\pm$  s.e.m., \*\*\*  $p \leq 0.001$ ). 3 independent samples were used for each experiment and details are SI Appendix, Table S9.

**Fig. S6. Distribution of translocation junctions from *c-myc*-Cas9 DSB to  $S\mu$  and  $S\alpha$  regions in WT, ATM-, 53BP1-, and Ligase4-deficient CH12F3 cells**

WT, ATM-, 53BP1- and Ligase4-deficient CH12F3 cells were stimulated with  $\alpha$ CD40/IL4/TGF- $\beta$  and *c-myc*-Cas9 bait DSB was introduced at 12 hrs after stimulation. HTGTS libraries were made with genomic DNA harvested 72 hrs after stimulation. Each clone has 3 experimental replicates. All libraries were plotted linearly as percentage of junctions mapped to 20 kb  $S\mu$  **(A)** or  $S\alpha$  **(B)** region.

**Fig. S7. Comparison of translocation junctions to general DSBs in WT, ATM<sup>-/-</sup>, p53<sup>-/-</sup> and XRCC4<sup>-/-</sup>p53<sup>-/-</sup> NSPCs.**

HTGTS libraries were made with *c-myc*-Cas9 DSB as bait in WT, ATM<sup>-/-</sup>, p53<sup>-/-</sup> and XRCC4<sup>-/-</sup>p53<sup>-/-</sup> NSPCs. **(A)** Translocation outcomes of *c-myc*-Cas9 DSB to genome-wide MH usage in junctions from *c-myc*-Cas9 break joining to genome-wide breaks **(A)** were plotted as percentage of junctions with indicated length of MH over the total number of junctions in the respective regions. **(B-C)** Percentages of direct joins from *c-myc*-Cas9 break joining to genome-wide breaks **(B)**, and percentages of junctions with 4bp and longer MH from *c-myc*-Cas9 break to genome-wide breaks **(C)** in different genetic backgrounds are shown. Unpaired two-tailed t-test was used for statistical analysis (Quantitative data = average  $\pm$  s.e.m., n.s. means  $p > 0.05$ , \*  $p \leq 0.05$ , \*\*  $p \leq 0.01$ , \*\*\*  $p \leq 0.001$ ). Note that the WT, p53<sup>-/-</sup> and XRCC4<sup>-/-</sup>p53<sup>-/-</sup> NSPCs are re-plotted from an earlier published study from our lab (2) for comparison with the new ATM<sup>-/-</sup> data performed in the same cell type using a *c-myc* sgRNA described in (2).

**Table S1. Percentage of junctions with insertions from WT, ATM- and 53BP1-deficient primary B cells**

The percentage of S $\mu$ -S $\gamma$ 1 and S $\mu$ -S $\epsilon$  junctions with various lengths of insertions among all junctions in the same region recovered from individual libraries made with  $\alpha$ CD40/IL4 *in vitro* activated WT, ATM- and 53BP1-deficient primary B cells were listed.

**Table S2. Summary for junctions analyzed in each experimental replicate in S $\gamma$ 1 and S $\epsilon$  region from primary B cells with various genotypes**

Summary of junctions recovered from each replicate library with  $\alpha$ CD40/IL4-stimulated primary wild type, *ATM*<sup>-/-</sup>, *H2AX*<sup>-/-</sup>, *RIF1*<sup>flox/flox</sup> *CD19*<sup>Cre/+</sup> and *53BP1*<sup>-/-</sup> B cells, showing the S $\gamma$ 1 and S $\epsilon$  junctions identified and percentage of direct joins in each region from each library.

**Table S3. Summary of MH length in S $\mu$ -S $\gamma$ 1, S $\mu$ -S $\epsilon$  junctions from primary B cells with various genotypes**

Length of MH (average  $\pm$  s.e.m.) for CSR junctions in various genotypes as described in Fig. 1 is listed. Numbers in parenthesis indicate total number of direct joins plus junctions with MH in the range of 1-10bp mapped to the S regions recovered from various replicates of indicated genotypes. Average length of MH for junctions joining in deletional orientation (-) and inversional orientation (+) are also shown.

**Table S4. Summary for junctions analyzed in each experimental replicate in S $\alpha$  region from CH12F3 cells with various genotypes**

Summary of junctions recovered from each replicate library with  $\alpha$ CD40/IL4/TGF- $\beta$ -stimulated wild type, *ATM*<sup>-/-</sup>, *53BP1*<sup>-/-</sup> and *Ligase4*<sup>-/-</sup> CH12F3 cells with non-productive allele deletion, showing number of S $\alpha$  junctions identified, percentage of direct joins, junctions with more than 4 bp MH and junctions with insertions from each library.

**Table S5. Summary of MH length in S $\mu$ -S $\alpha$  junctions from CH12F3 cell lines with various genotypes**

Length of MH (average  $\pm$  s.e.m.) for CSR junctions in various genotypes as described in Fig. 2 is listed. Numbers in parenthesis indicate total number of direct joins plus junctions with MH in the range of 1-10bp mapped to the S $\alpha$  regions recovered from various replicates of indicated genotypes. Average length of MH for junctions joining in deletional orientation (-) and inversional orientation (+) are also shown.

**Table S6. Statistical comparison for orientation bias in S $\alpha$  junctions from CH12F3 cells with various genotypes**

p values calculated by unpaired two-tailed t-test for the degree of bias in the S $\alpha$  junctions between wild-type and DSBR-deficient B cells described in Fig. S4B. Orientation bias was calculated as described in the methods for individual genotypes.

**Table S7. Statistical comparison for resection in S $\alpha$  junctions from CH12F3 cells with various genotypes**

p values calculated by unpaired two-tailed t-test for the level of resections in the in the S $\alpha$  junctions between wild-type and DSBR-deficient B cells described in Fig. S4C. Percentage of junctions with long resections was calculated as described in the methods.

**Table S8. Summary of MH length in c-myc-S $\mu$ , S $\alpha$  and genome-wide translocations from CH12F3 cells with various genotypes**

Length of MH (average  $\pm$  s.e.m.) for total (T) translocations in various genotypes as described in Fig. 3 and Fig. S5 is listed. Numbers in parenthesis indicate total number of direct joins plus junctions with MH in the range of 1-10bp mapped to the S $\mu$ , S $\alpha$  and genome-wide translocations from various replicates of indicated genotypes. Average length of MH for junctions joining in deletional orientation (-) and inversional orientation (+) are also shown.

**Table S9. Summary for junctions analyzed in each experimental replicate in S $\mu$ , S $\alpha$  and genome-wide translocations from CH12F3 cells with various genotypes**

Summary of translocation junctions from *c-myc*-Cas9 break to S region breaks and genome-wide general DSBs recovered from each replicate library with  $\alpha$ CD40/IL4/TGF- $\beta$ -stimulated wild type, *ATM*<sup>-/-</sup>, *53BP1*<sup>-/-</sup> and *Ligase4*<sup>-/-</sup> CH12F3 cells, showing number of junctions identified in various regions and percentage of direct joins and junctions using 4 bp or longer MH from each library.

1. Dong J, *et al.* (2015) Orientation-specific joining of AID-initiated DNA breaks promotes antibody class switching. *Nature* 525(7567):134-139.
2. Wei PC, *et al.* (2016) Long Neural Genes Harbor Recurrent DNA Break Clusters in Neural Stem/Progenitor Cells. *Cell* 164(4):644-655.

**Fig. S1**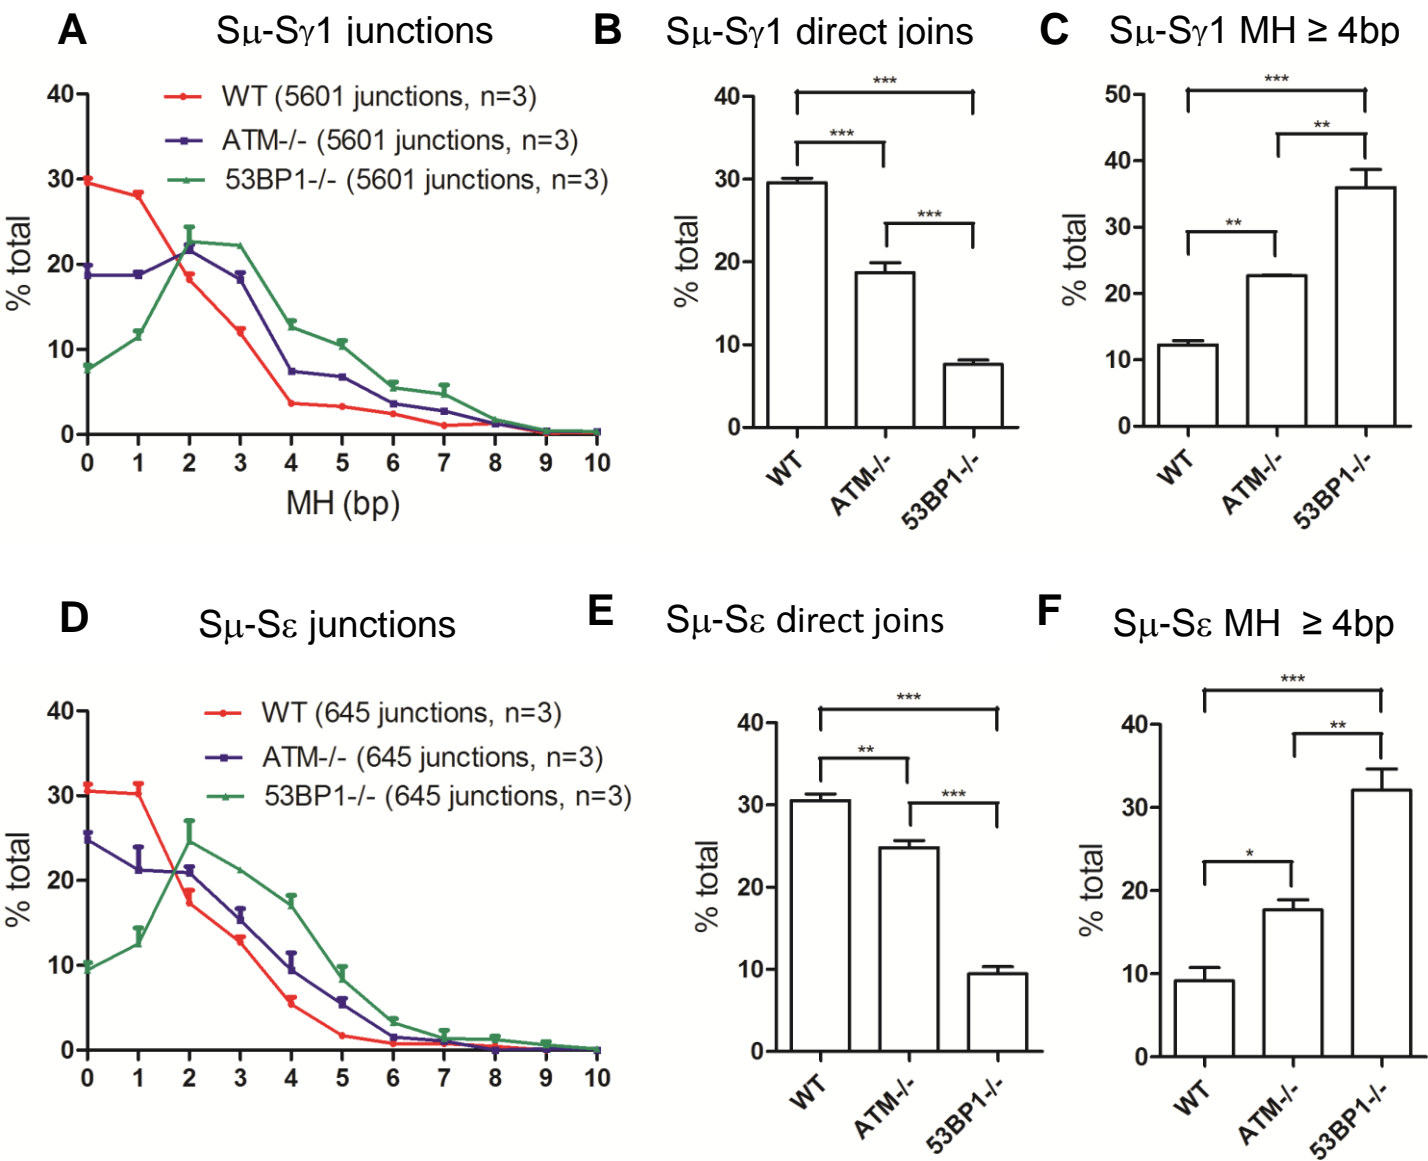

**Fig. S2**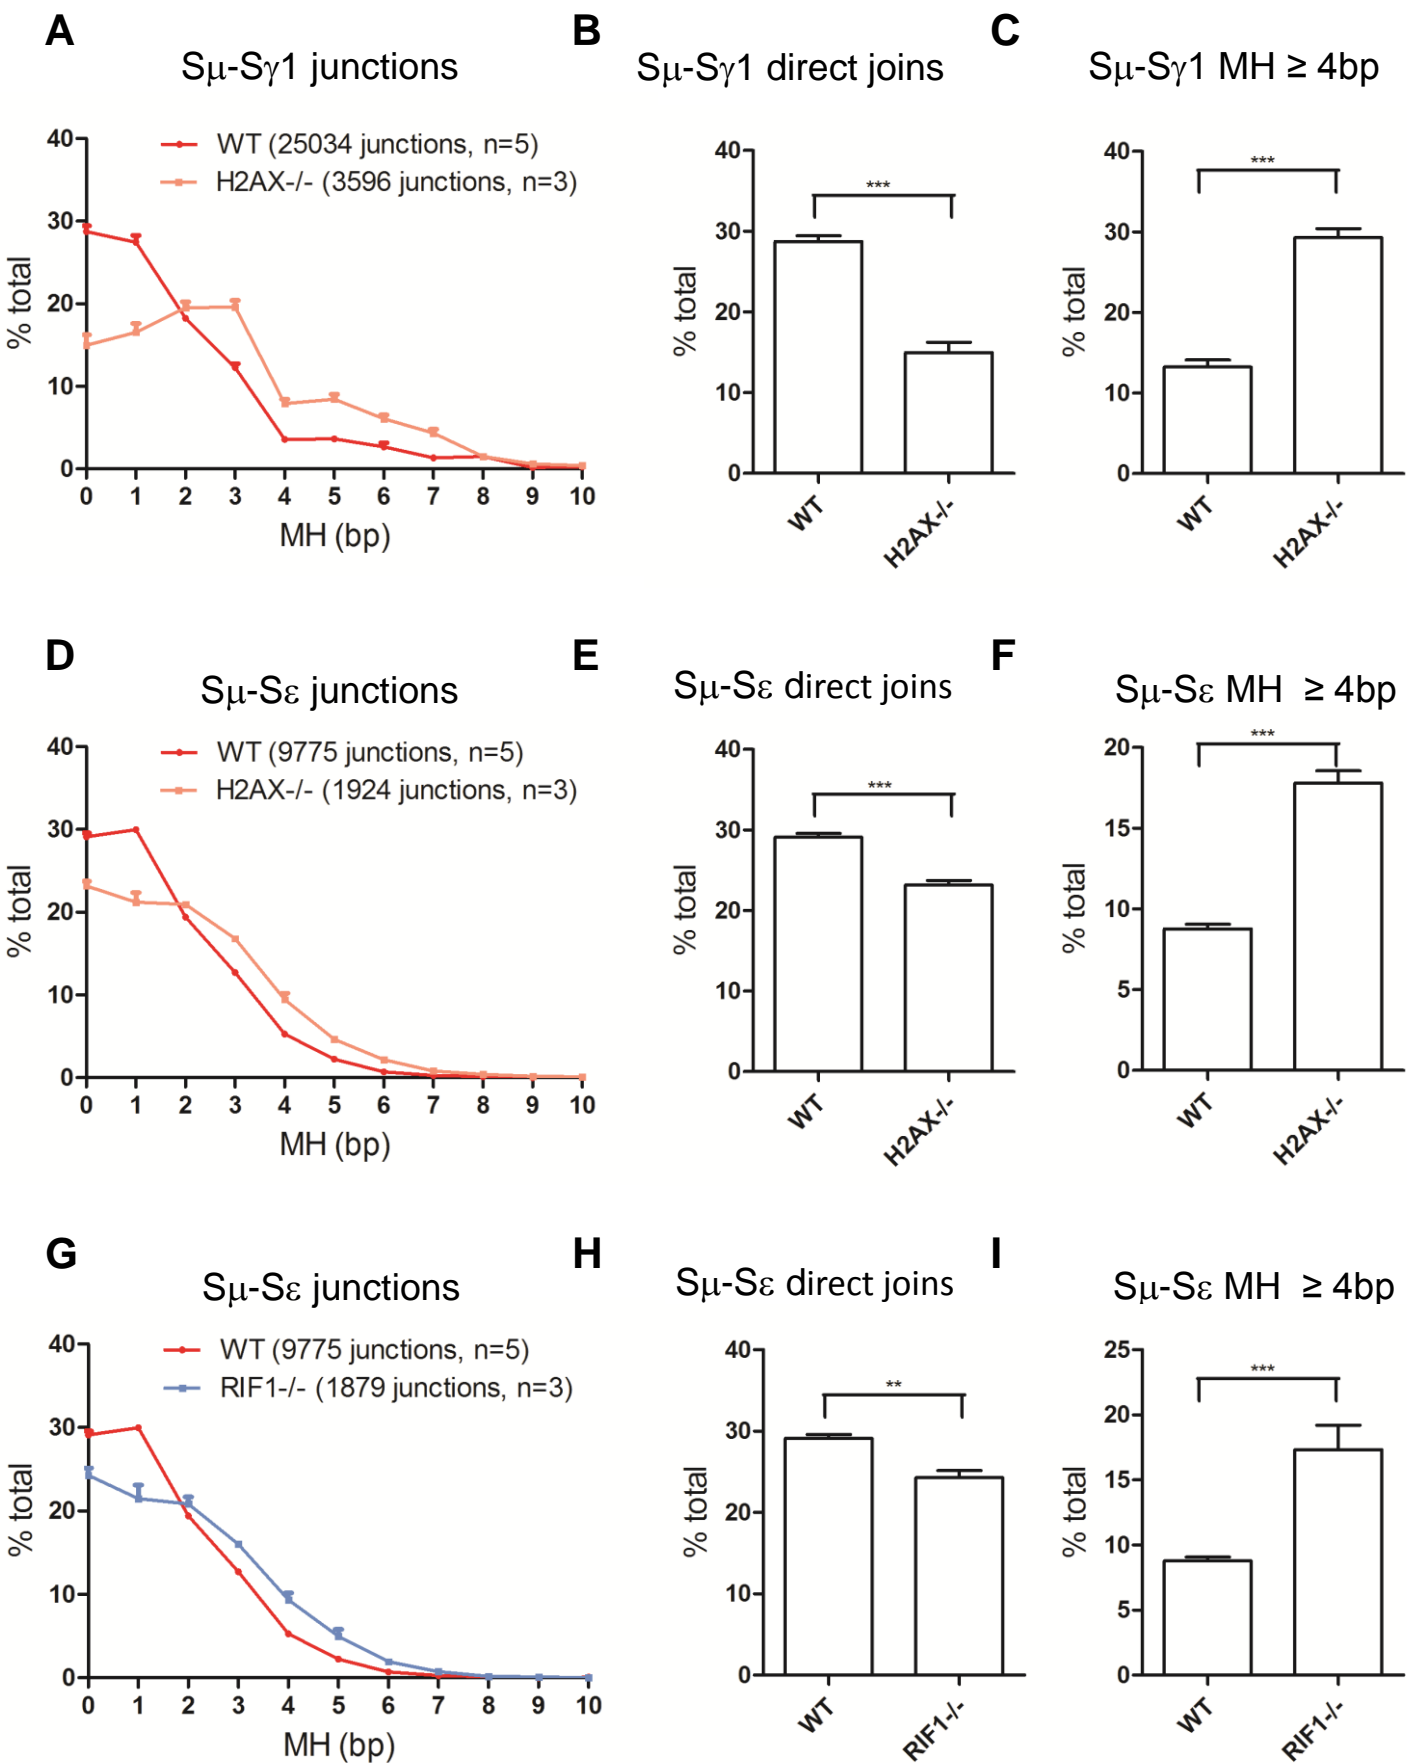



**Fig. S3**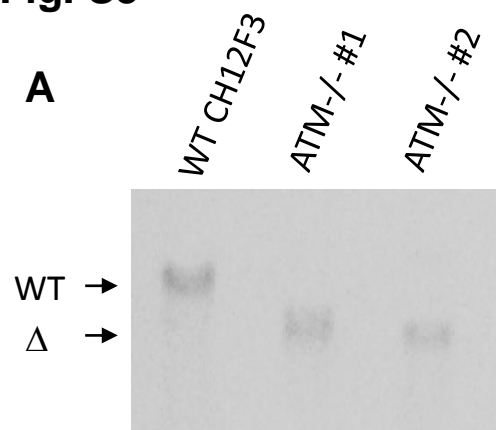

EcoRV+BamHI digest, exon-56 probe,  
WT:7.5 kb; Del:6.0 kb

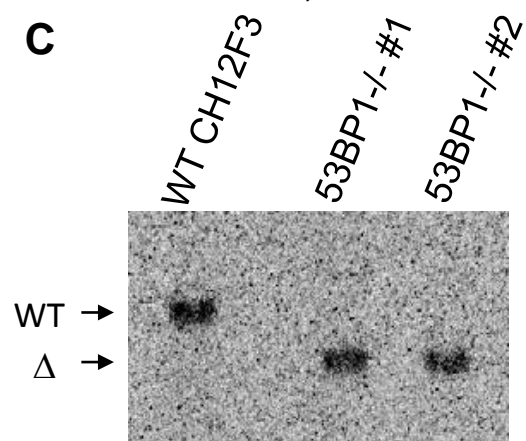

NdeI digest, 5' 53bp1 probe,  
WT:4.32 kb; Del:3.46 kb

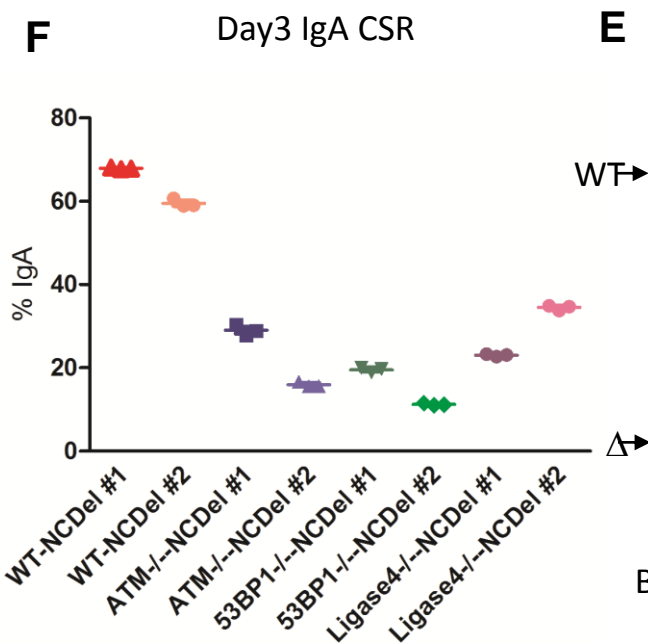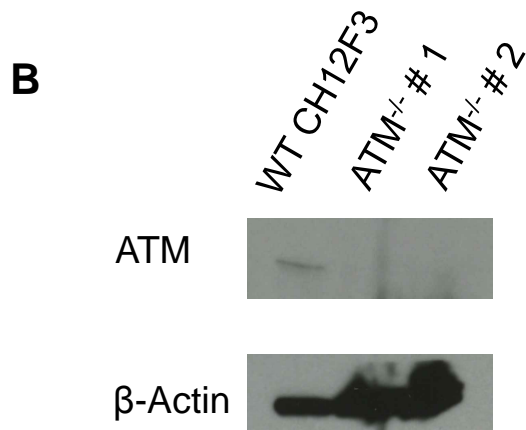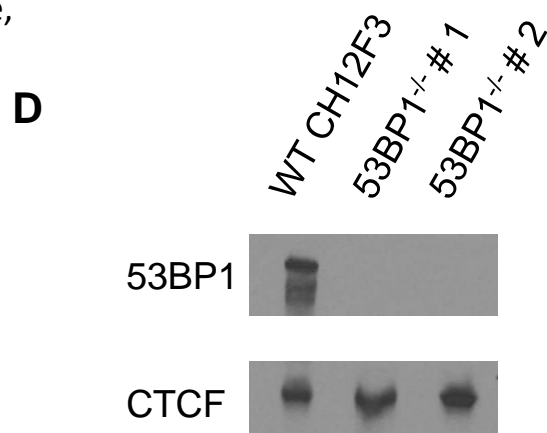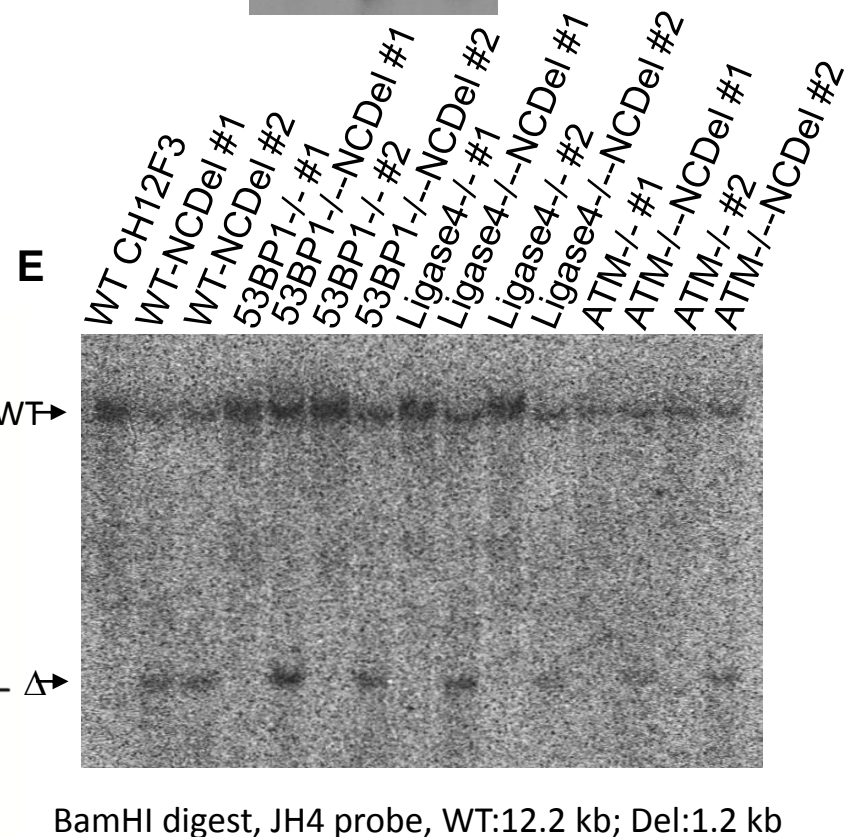

BamHI digest, JH4 probe, WT:12.2 kb; Del:1.2 kb

**Fig. S4****A****WT-NCDel #1**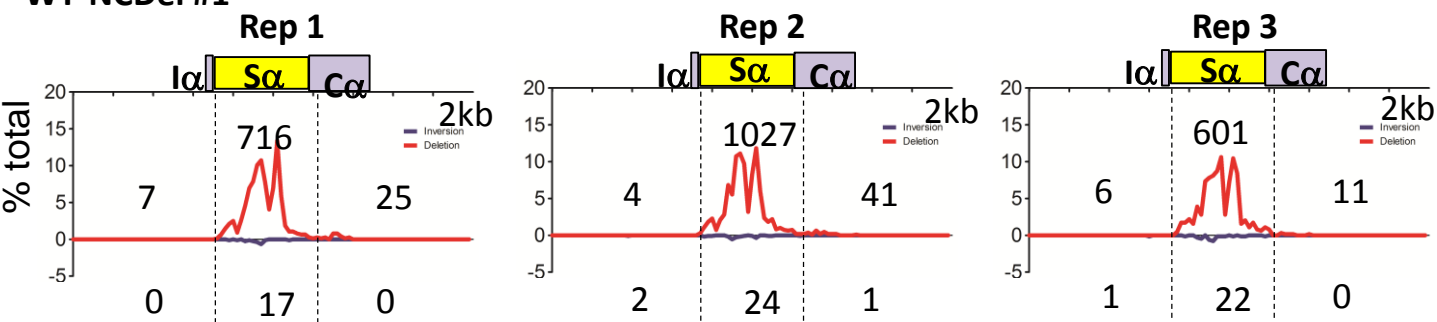**WT-NCDel #2**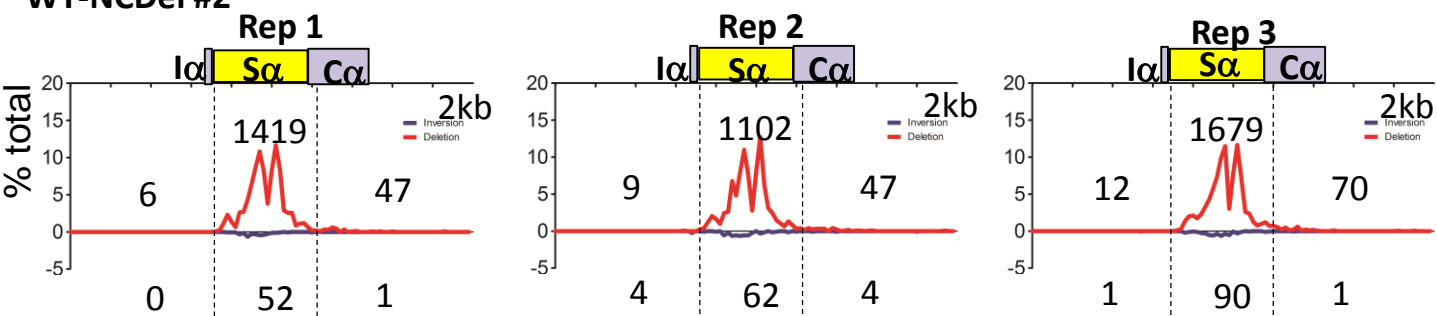**ATM-NCDel #1**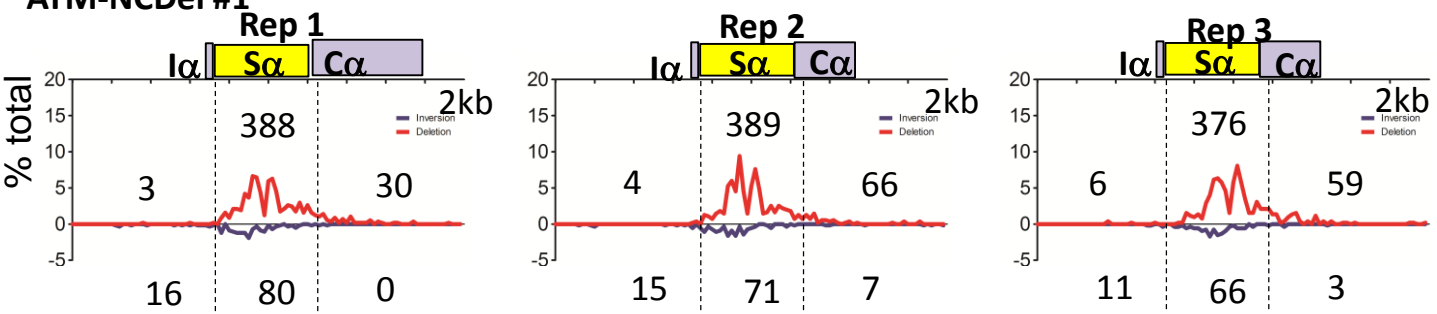**ATM-NCDel #2**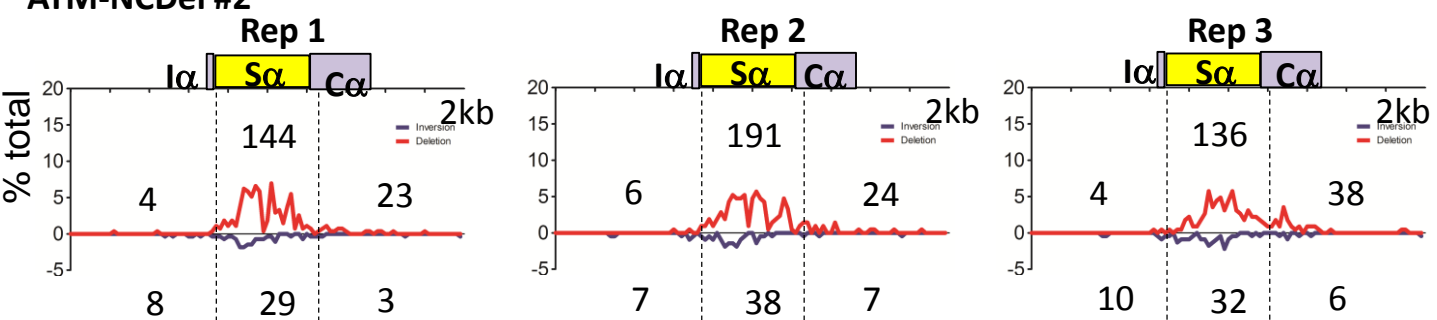

**Fig. S4****A**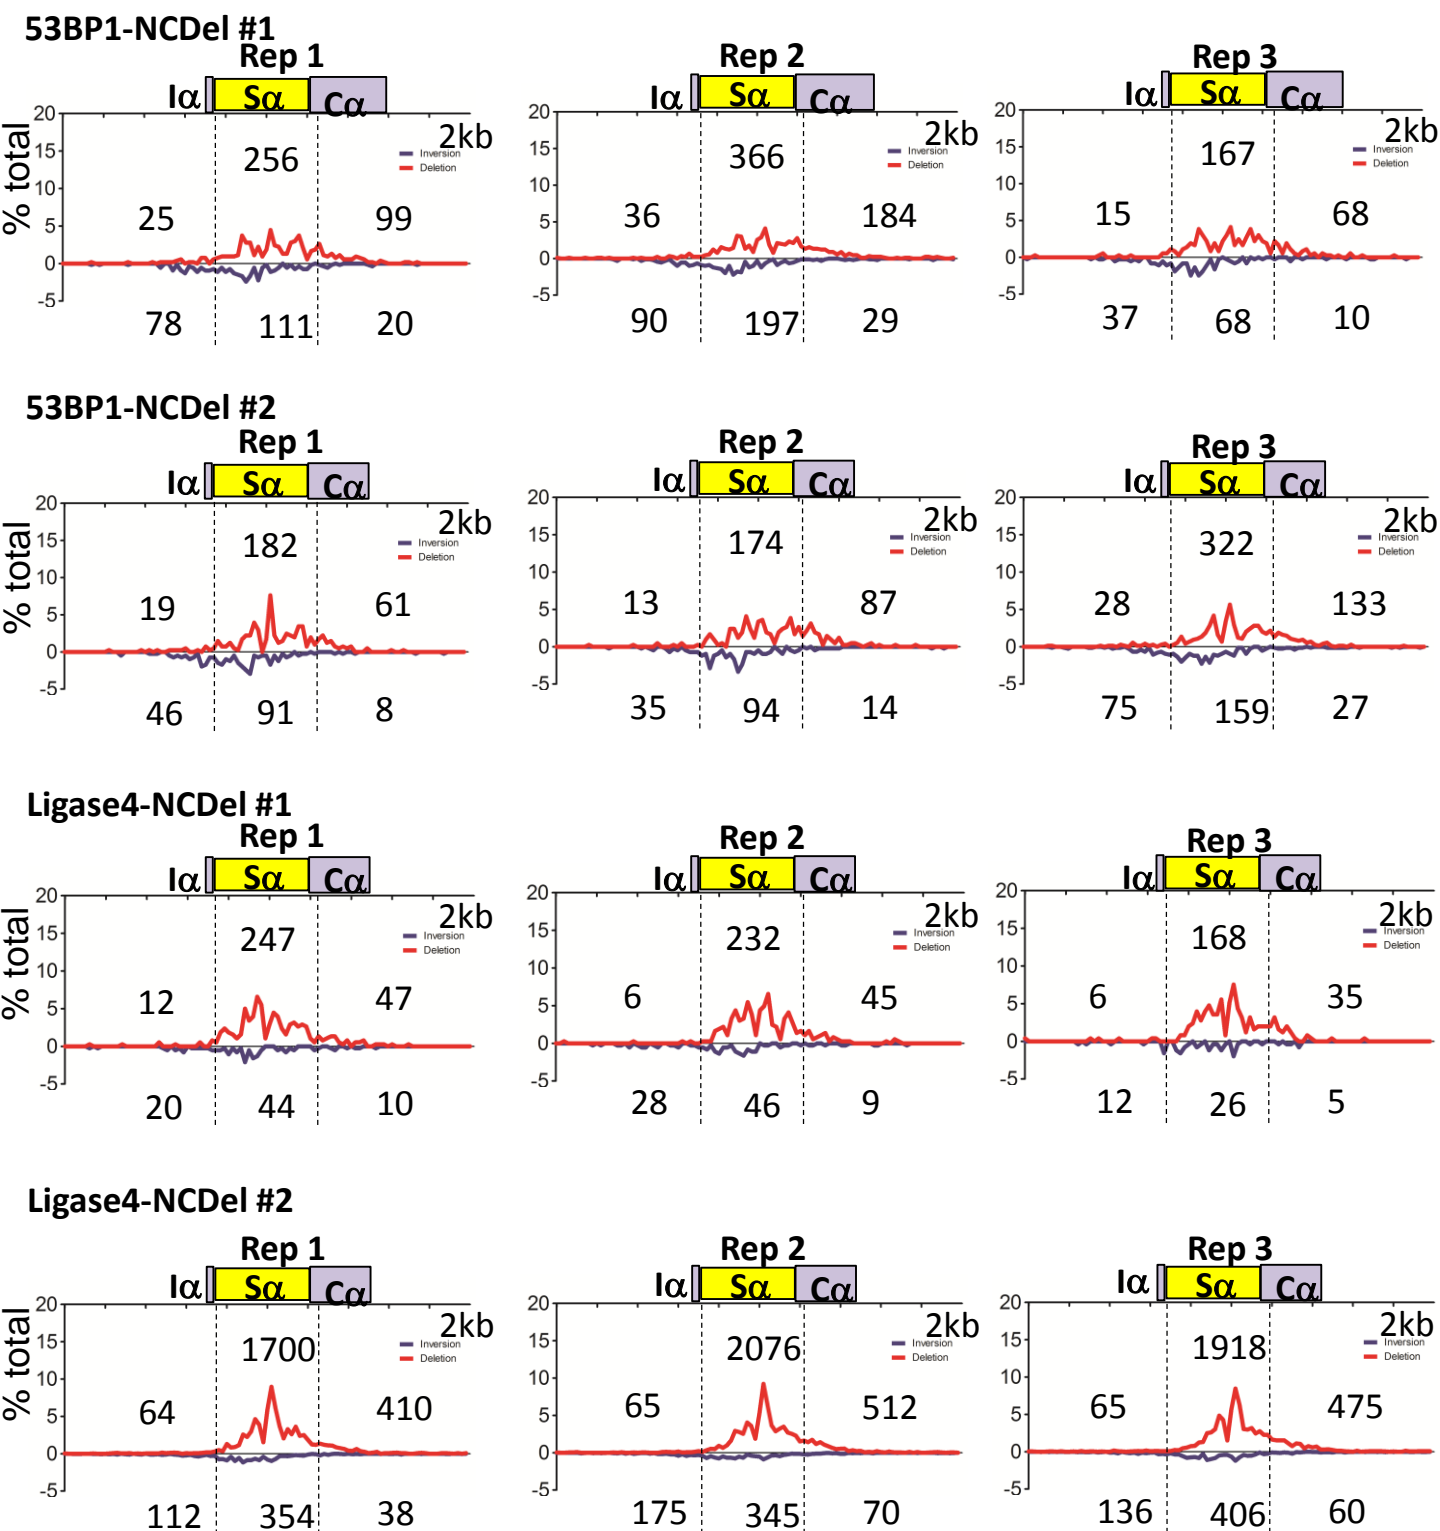

**Fig. S4**

**B**

Bias ratio  $S_{\alpha}$

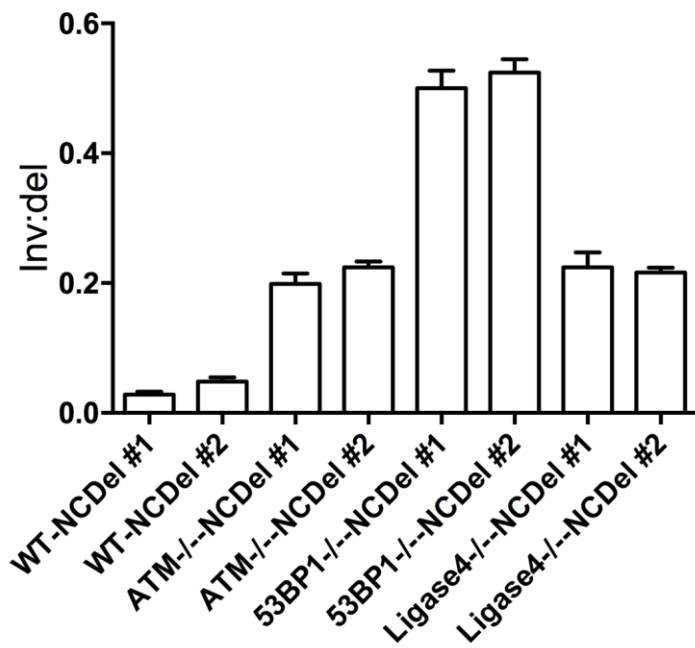

**C**

Resection  $S_{\alpha}$

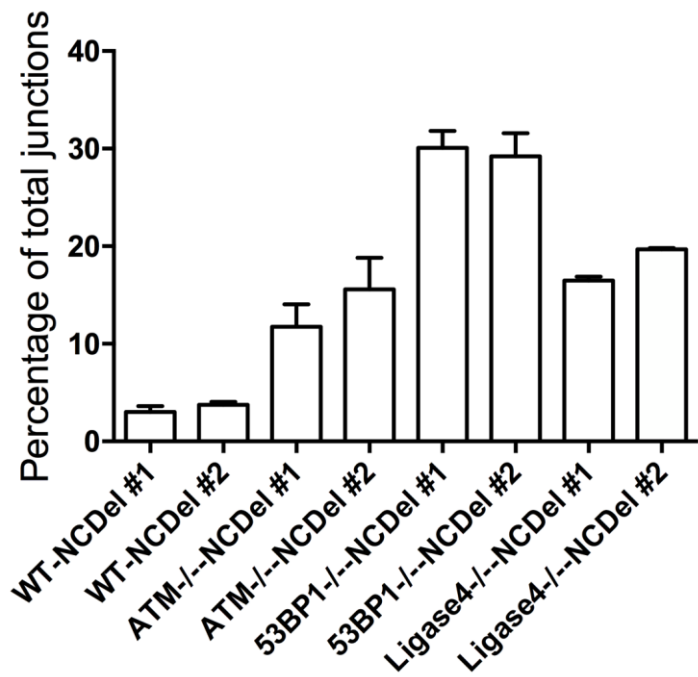

**Fig. S5****A**c-myc to S $\mu$  translocations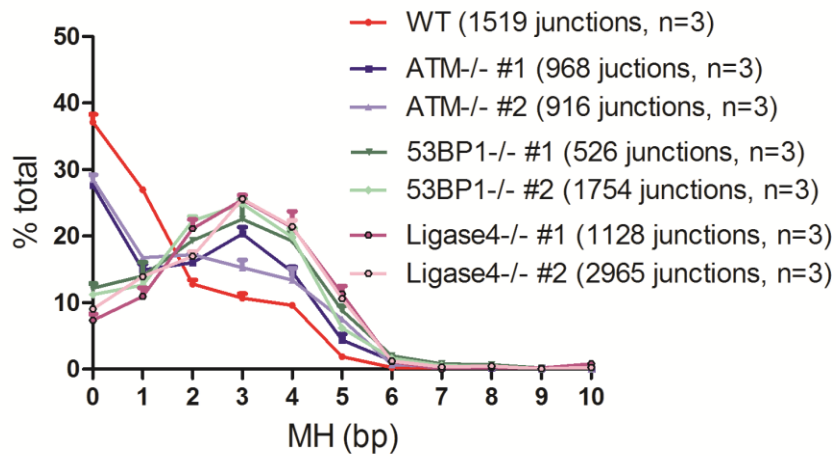**B**c-myc-S $\mu$  direct joins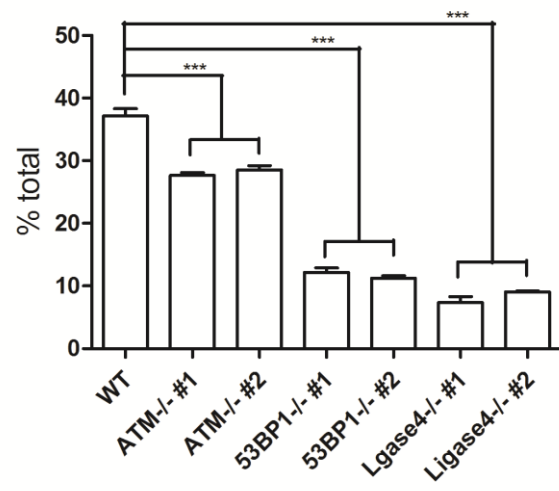**C**c-myc-S $\mu$  MH  $\geq$  4bp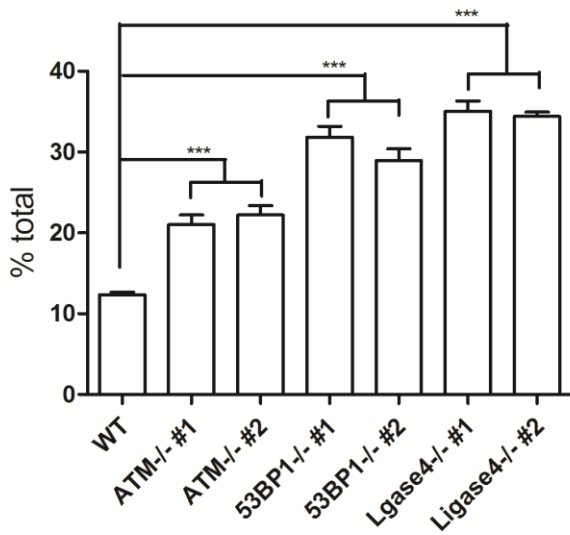

**Fig. S6****A**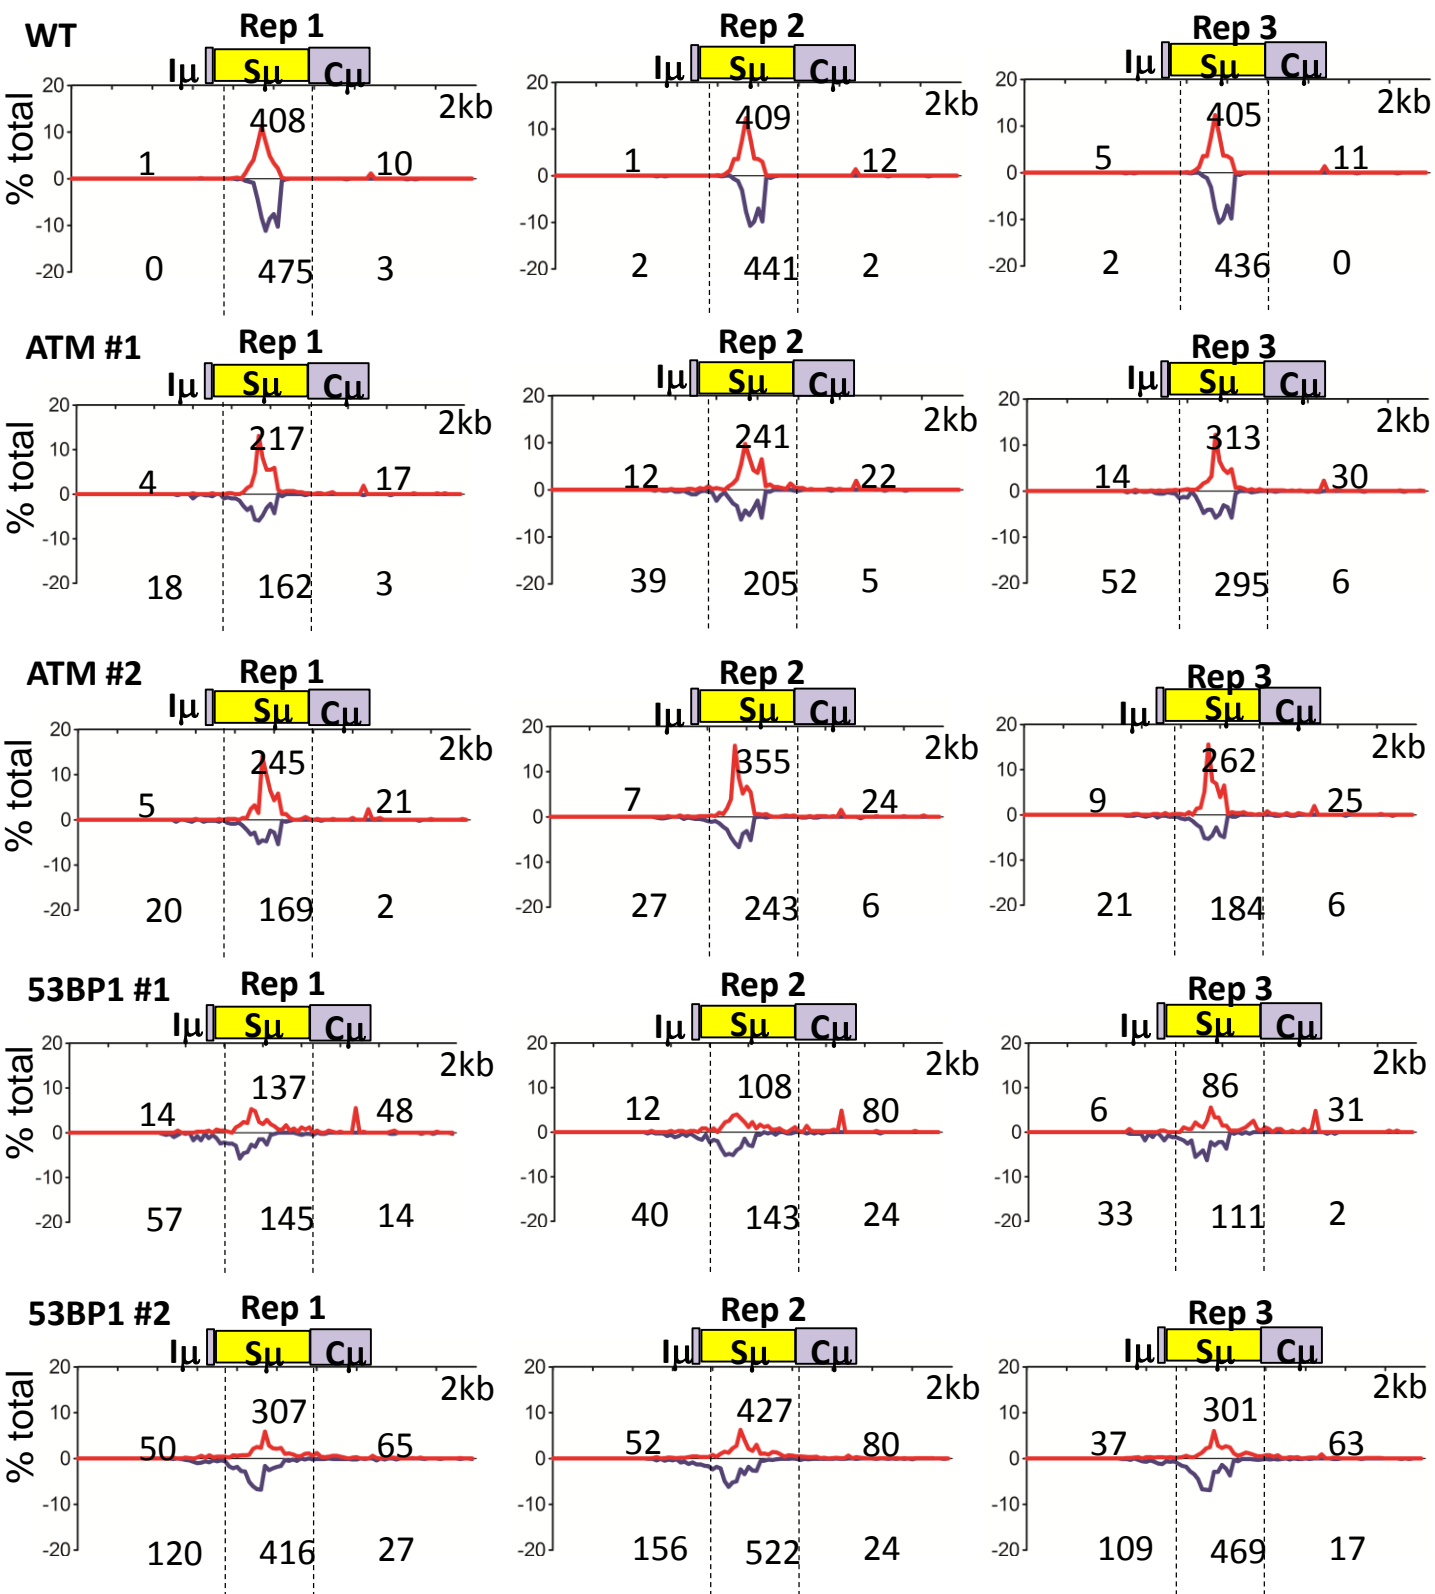

**Fig. S6****A**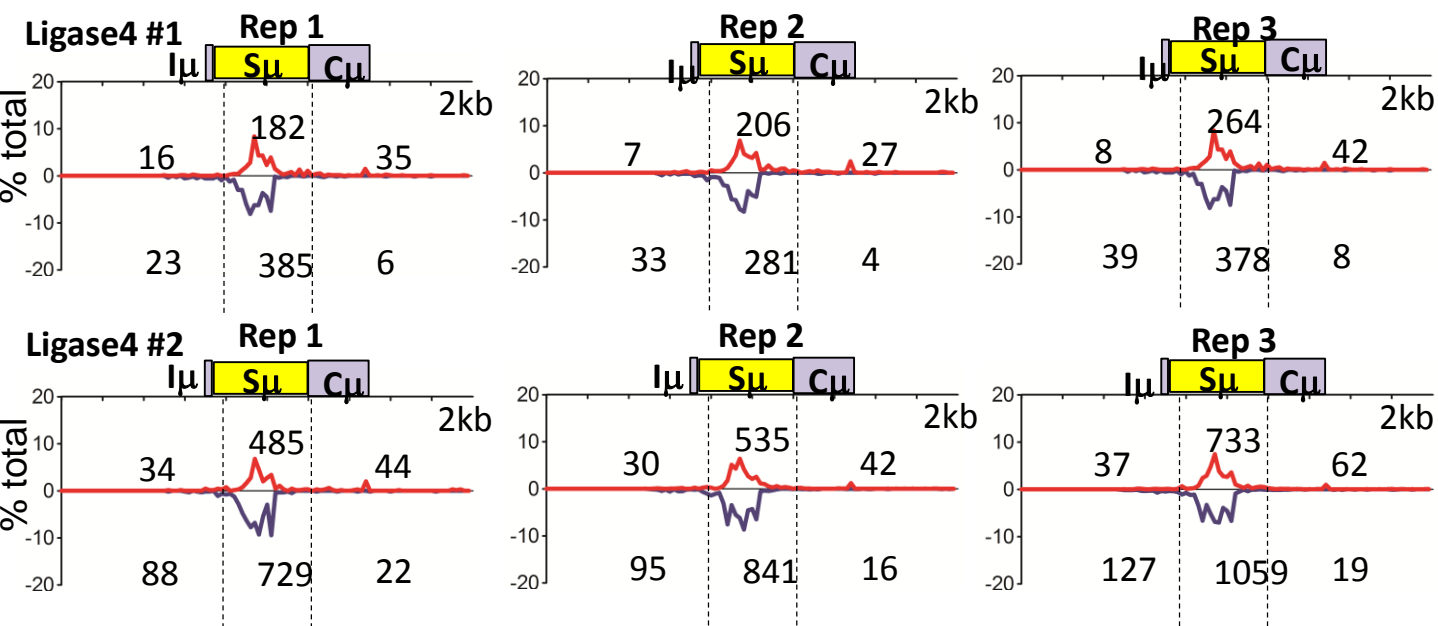

**Fig. S6****B**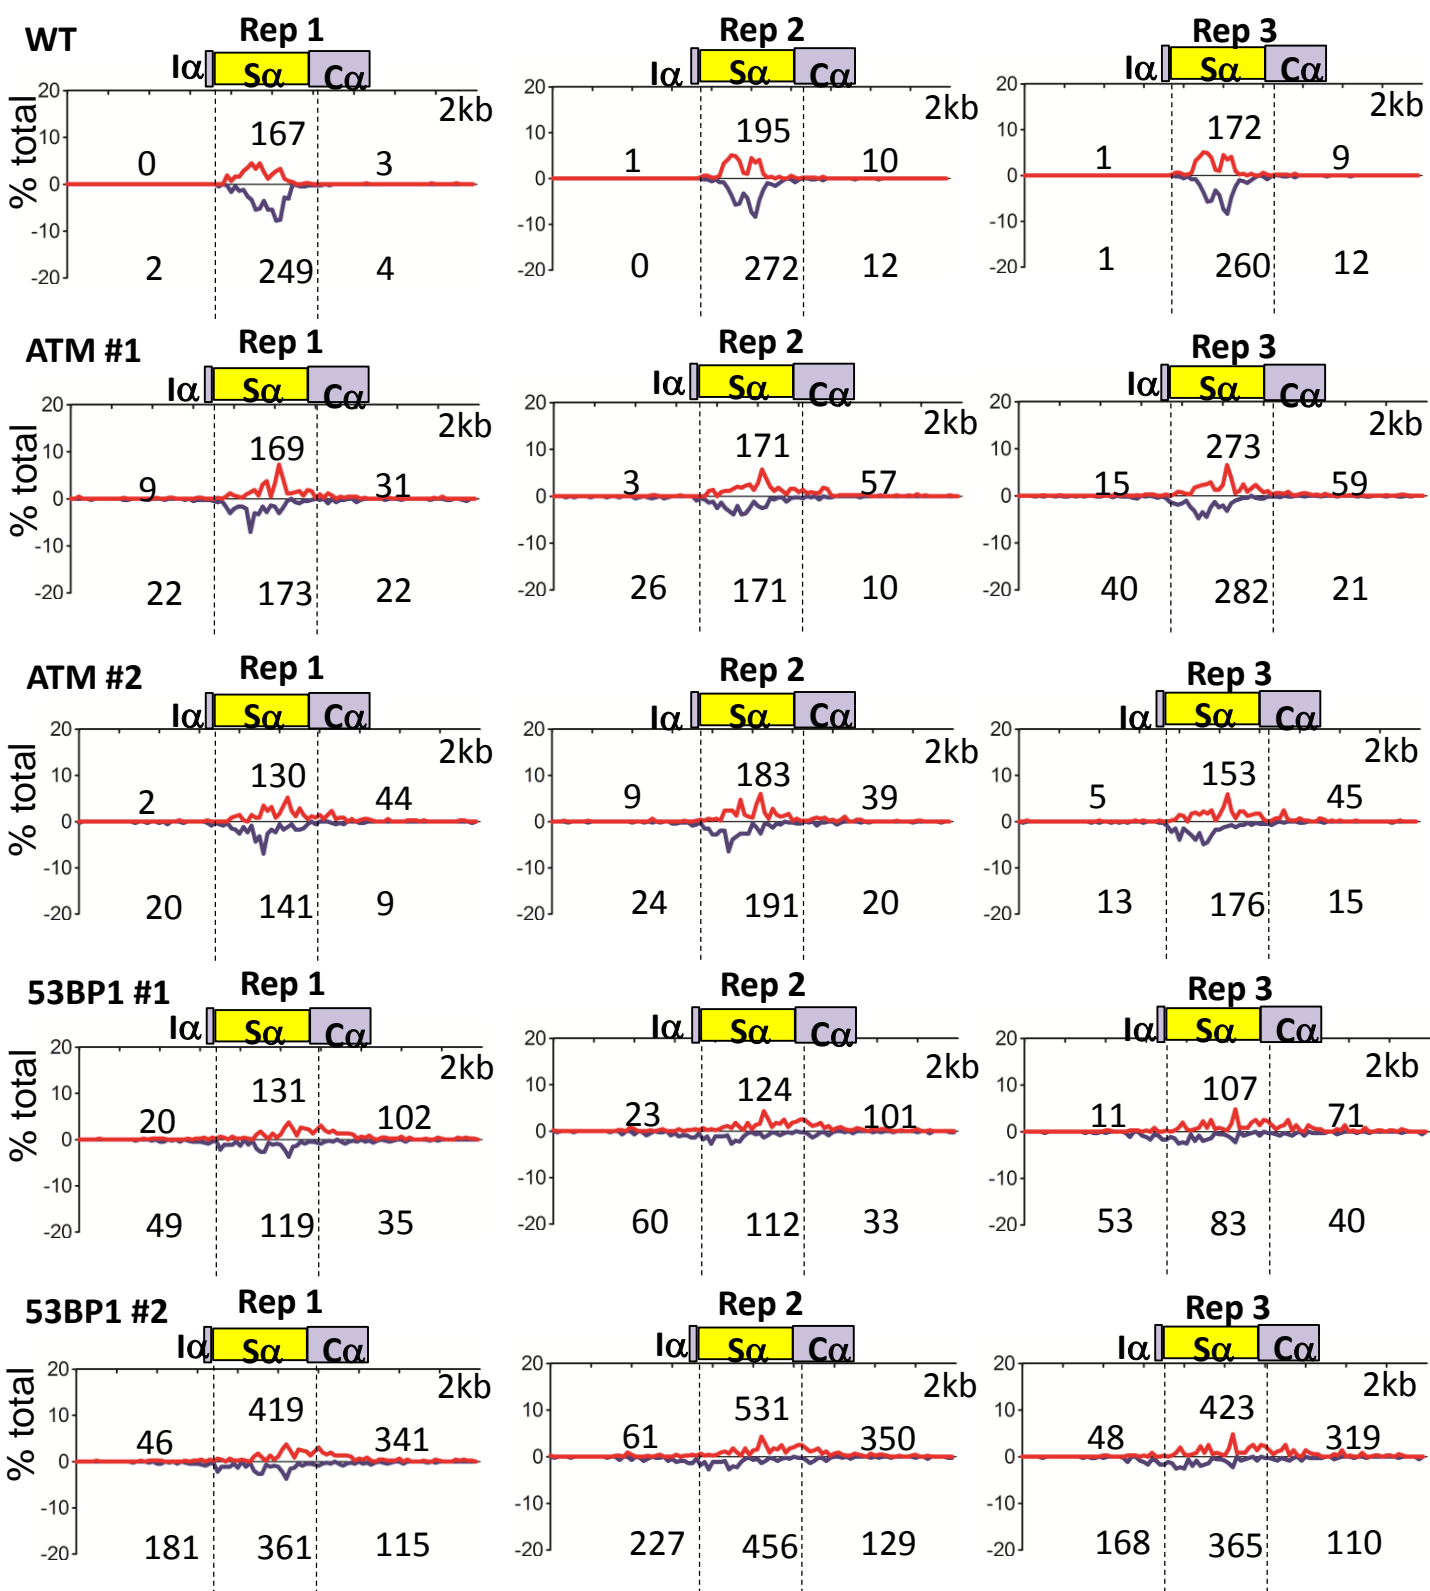



**Fig. S6****B**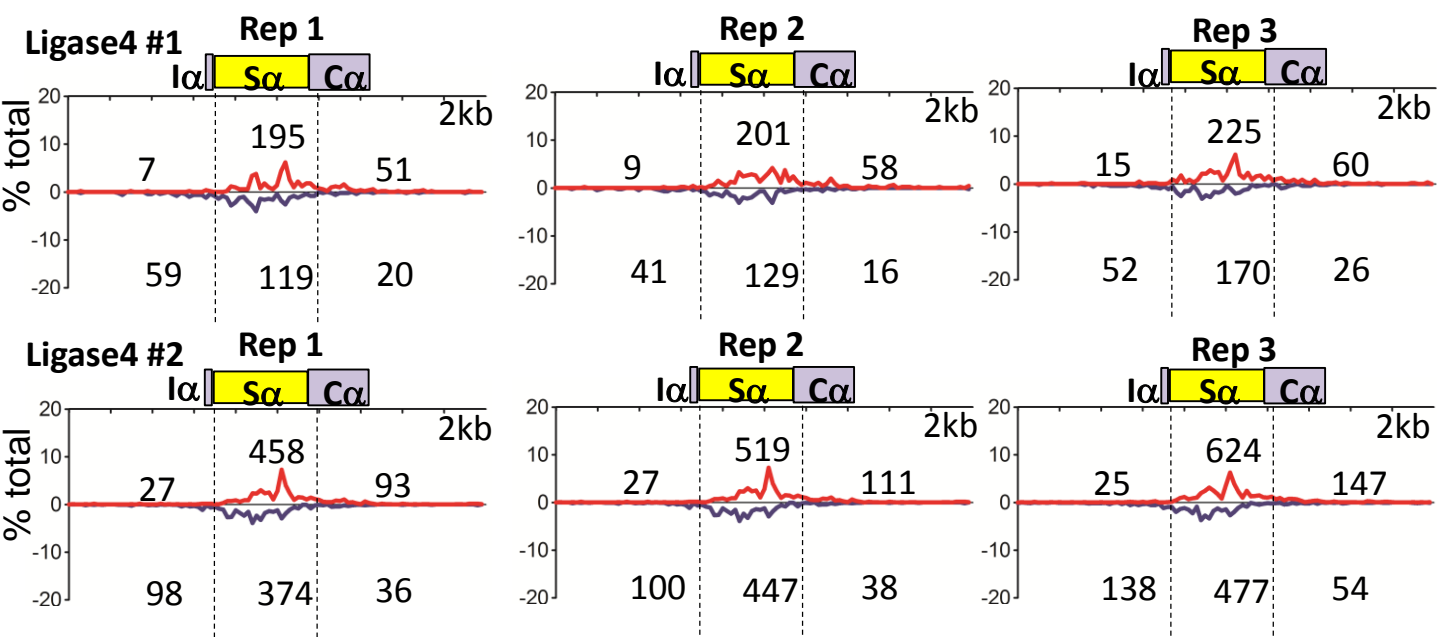

**Fig. S7****A**c-myc to genome-wide  
translocations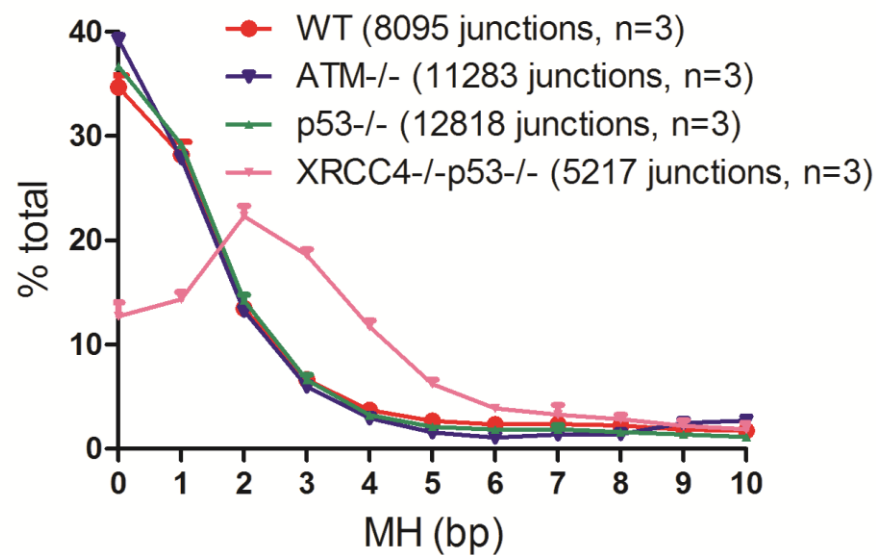**B**c-myc-genome-wide  
direct joins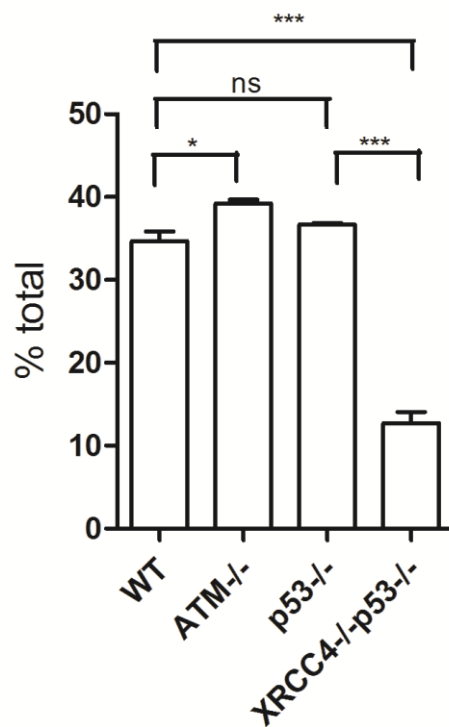**C**c-myc-genome-wide  
MH ≥ 4bp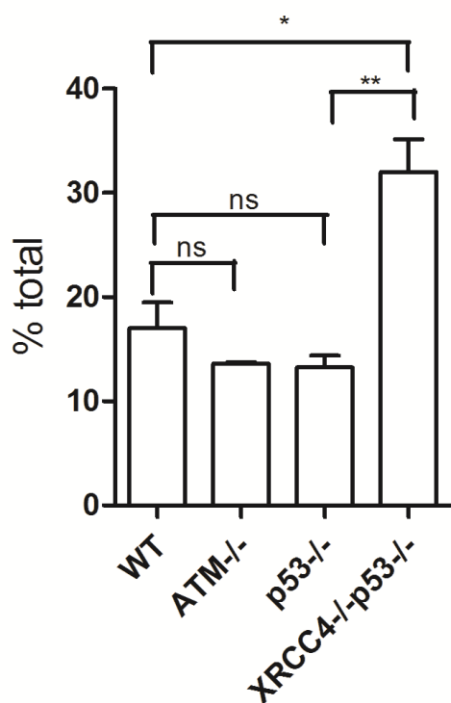

**Table S1 Percentage of junctions with insertions from WT, ATM- and 53BP1-deficient primary B cells**

| Genotype | % insertion in S $\gamma$ 1 junctions | % insertion in S $\epsilon$ junctions |
|----------|---------------------------------------|---------------------------------------|
| WT-1     | 19.0%                                 | 17.5%                                 |
| WT-2     | 17.4%                                 | 12.7%                                 |
| WT-3     | 18.5%                                 | 17.2%                                 |
| WT-4     | 25.6%                                 | 23.8%                                 |
| WT-5     | 22.5%                                 | 20.4%                                 |
| ATM-1    | 16.7%                                 | 15.8%                                 |
| ATM-2    | 15.4%                                 | 16.4%                                 |
| ATM-3    | 15.9%                                 | 17.0%                                 |
| 53BP1-1  | 12.7%                                 | 16.1%                                 |
| 53BP1-2  | 14.0%                                 | 17.2%                                 |
| 53BP1-3  | 15.3%                                 | 19.4%                                 |
| 53BP1-4  | 16.3%                                 | 17.6%                                 |
| 53BP1-5  | 16.4%                                 | 19.6%                                 |
| 53BP1-6  | 14.4%                                 | 19.8%                                 |
| 53BP1-7  | 17.9%                                 | 18.1%                                 |
| 53BP1-8  | 14.2%                                 | 15.9%                                 |

**Table S2 Summary for junctions analyzed in each experiment replicate in Sy1 and Sε region from primary B cells with various genotypes**

| Genotype | Sy1 jxns (% IgH) | Sε jxns (% IgH) | IgH total | Sy1 jxns | Sε jxns  |
|----------|------------------|-----------------|-----------|----------|----------|
|          |                  |                 |           | % direct | % direct |
| WT-1     | 1465 (58%)       | 479 (19%)       | 2522      | 26.0%    | 28.5%    |
| WT-2     | 2764 (62%)       | 732 (16%)       | 4460      | 29.2%    | 30.4%    |
| WT-3     | 17135 (56%)      | 7913 (25%)      | 30368     | 29.9%    | 29.7%    |
| WT-4     | 9124 (64%)       | 2560 (18%)      | 14123     | 29.2%    | 28.1%    |
| WT-5     | 2398 (56%)       | 988 (23%)       | 4285      | 29.3%    | 29.6%    |
| ATM-1    | 7453 (42%)       | 2002 (11%)      | 17712     | 17.0%    | 18.2%    |
| ATM-2    | 6246 (46%)       | 1467 (11%)      | 13503     | 18.6%    | 22.8%    |
| ATM-3    | 6761 (44%)       | 1827 (12%)      | 15376     | 19.5%    | 24.1%    |
| 53BP1-1  | 566 (12%)        | 199 (4.2%)      | 4690      | 8.5%     | 13.1%    |
| 53BP1-2  | 726 (14%)        | 256 (4.9%)      | 5191      | 7.1%     | 9.9%     |
| 53BP1-3  | 1475 (20%)       | 119 (1.6%)      | 7256      | 6.9%     | 11.7%    |
| 53BP1-4  | 2311 (21%)       | 272 (2.5%)      | 10851     | 7.0%     | 8.0%     |
| 53BP1-5  | 1733 (20%)       | 155 (1.8%)      | 8552      | 7.7%     | 3.0%     |
| 53BP1-6  | 817 (14%)        | 119 (1.6%)      | 5919      | 8.2%     | 11.5%    |
| 53BP1-7  | 3090 (22%)       | 381 (2.8%)      | 13506     | 7.4%     | 11.7%    |
| 53BP1-8  | 3325 (21%)       | 372( 2.5%)      | 14876     | 6.4%     | 8.7%     |
| H2AX-1   | 671 (22%)        | 393 (13%)       | 3080      | 12.6%    | 23.2%    |
| H2AX-2   | 1639 (19%)       | 1205 (14%)      | 8471      | 14.7%    | 25.4%    |
| H2AX-3   | 2146 (25%)       | 1015 (12%)      | 8750      | 17.2%    | 23.7%    |
| RIF1-1   | -                | 691 (14%)       | 5047      | -        | 27.0%    |
| RIF1-2   | -                | 1320 (13%)      | 10489     | -        | 24.4%    |
| RIF1-3   | -                | 609 (11%)       | 5623      | -        | 24.0%    |

**Table S3 Summary of MH length in S $\mu$ -S $\gamma$ 1, S $\mu$ -S $\epsilon$  junctions from primary B cells with various genotypes**

| Genotype             | S $\gamma$ 1                                                        | S $\epsilon$                                                        |
|----------------------|---------------------------------------------------------------------|---------------------------------------------------------------------|
| WT                   | 1.67 $\pm$ 0.01 (n=25034)                                           | 1.48 $\pm$ 0.01 (n=9775)                                            |
|                      | <i>S<math>\gamma</math>1(-): 1.68<math>\pm</math>0.01 (n=23236)</i> | <i>S<math>\epsilon</math>(-): 1.46<math>\pm</math>0.01 (n=9305)</i> |
|                      | <i>S<math>\gamma</math>1(+): 1.55<math>\pm</math>0.04 (n=1798)</i>  | <i>S<math>\epsilon</math>(+): 1.71<math>\pm</math>0.08 (n=470)</i>  |
| ATM <sup>-/-</sup>   | 2.40 $\pm$ 0.02 (n=16730)                                           | 2.04 $\pm$ 0.03 (n=4422)                                            |
|                      | <i>S<math>\gamma</math>1(-): 2.45<math>\pm</math>0.02 (n=13963)</i> | <i>S<math>\epsilon</math>(-): 2.00<math>\pm</math>0.03 (n=3931)</i> |
|                      | <i>S<math>\gamma</math>1(+): 2.15<math>\pm</math>0.03 (n=2767)</i>  | <i>S<math>\epsilon</math>(+): 2.38<math>\pm</math>0.08 (n=491)</i>  |
| H2AX <sup>-/-</sup>  | 2.84 $\pm$ 0.04 (n=3596)                                            | 1.96 $\pm$ 0.04 (n=1924)                                            |
|                      | <i>S<math>\gamma</math>1(-): 2.87<math>\pm</math>0.04 (n=3278)</i>  | <i>S<math>\epsilon</math>(-): 1.89<math>\pm</math>0.04 (n=1771)</i> |
|                      | <i>S<math>\gamma</math>1(+): 2.55<math>\pm</math>0.13 (n=318)</i>   | <i>S<math>\epsilon</math>(+): 2.74<math>\pm</math>0.14 (n=153)</i>  |
| Rif1 <sup>-/-</sup>  | N.A.                                                                | 1.89 $\pm$ 0.04 (n=1879)                                            |
|                      |                                                                     | <i>S<math>\epsilon</math>(-): 1.77<math>\pm</math>0.04 (n=1637)</i> |
|                      |                                                                     | <i>S<math>\epsilon</math>(+): 2.28<math>\pm</math>0.12 (n=242)</i>  |
| 53BP1 <sup>-/-</sup> | 3.17 $\pm$ 0.02 (n=8578)                                            | 2.80 $\pm$ 0.04(n=1828)                                             |
|                      | <i>S<math>\gamma</math>1(-): 3.35<math>\pm</math>0.03 (n=5970)</i>  | <i>S<math>\epsilon</math>(-): 2.76<math>\pm</math>0.05 (n=1142)</i> |
|                      | <i>S<math>\gamma</math>1(+): 2.76<math>\pm</math>0.03(n=2608)</i>   | <i>S<math>\epsilon</math>(+): 2.84<math>\pm</math>0.07 (n=686)</i>  |

**Table S4 Summary for junctions analyzed in each experiment replicate in S $\alpha$  region from CH12F3 cells with various genotypes**

| Genotype                         | core Sa | % direct joins/MH $\geq$ 4bp | % insertion joins |
|----------------------------------|---------|------------------------------|-------------------|
| WT-NCDel #1                      |         |                              |                   |
| Exp 1                            | 733     | 24.2/13.2                    | 25.5              |
| Exp 2                            | 1051    | 25.4/12.4                    | 20.8              |
| Exp 3                            | 623     | 25.7/15.2                    | 24.7              |
| WT-NCDel #2                      |         |                              |                   |
| Exp 1                            | 1471    | 24.5/14.0                    | 26.1              |
| Exp 2                            | 1164    | 26.4/14.2                    | 27.1              |
| Exp 3                            | 1770    | 26.0/13.7                    | 27.9              |
| ATM <sup>-/-</sup> -NCDel #1     |         |                              |                   |
| Exp 1                            | 468     | 15.4/28.2                    | 12.6              |
| Exp 2                            | 460     | 17.6/24.8                    | 15.9              |
| Exp 3                            | 442     | 18.7/22.5                    | 12.7              |
| ATM <sup>-/-</sup> -NCDel #2     |         |                              |                   |
| Exp 1                            | 173     | 13.5/28.4                    | 10.4              |
| Exp 2                            | 229     | 15.3/28.2                    | 8.7               |
| Exp 3                            | 168     | 12.2/38.1                    | 12.5              |
| 53BP1 <sup>-/-</sup> -NCDel #1   |         |                              |                   |
| Exp 1                            | 367     | 5.6/32.5                     | 17.5              |
| Exp 2                            | 563     | 9.3/32.3                     | 16.0              |
| Exp 3                            | 235     | 8.2/28.9                     | 17.4              |
| 53BP1 <sup>-/-</sup> -NCDel #2   |         |                              |                   |
| Exp 1                            | 273     | 10.6/31.6                    | 17.6              |
| Exp 2                            | 268     | 5.5/39.6                     | 19.0              |
| Exp 3                            | 482     | 8.7/30.3                     | 18.5              |
| Ligase4 <sup>-/-</sup> -NCDel #1 |         |                              |                   |
| Exp 1                            | 291     | 5.8/27.1                     | 11.3              |
| Exp 2                            | 278     | 5.6/29.3                     | 10.4              |
| Exp 3                            | 194     | 5.6/32.5                     | 17.5              |
| Ligase4 <sup>-/-</sup> -NCDel #2 |         |                              |                   |
| Exp 1                            | 2055    | 8.0/28.9                     | 21.1              |
| Exp 2                            | 2421    | 7.2/27.2                     | 23.5              |
| Exp 3                            | 2324    | 7.3/27.7                     | 22.8              |

**Table S5 Summary of MH length in S $\mu$ -S $\alpha$  junctions from CH12F3 cell lines with various genotypes**

| Genotype                         | S $\alpha$                                                                                                                                                        |
|----------------------------------|-------------------------------------------------------------------------------------------------------------------------------------------------------------------|
| WT-NCDel #1                      | 1.70 $\pm$ 0.03 (n=1855)<br><i>S<math>\alpha</math>(-): 1.69<math>\pm</math>0.04 (n=1808)</i><br><i>S<math>\alpha</math>(+): 2.02<math>\pm</math>0.27 (n=47)</i>  |
| WT-NCDel #2                      | 1.74 $\pm$ 0.03 (n=3212)<br><i>S<math>\alpha</math>(-): 1.73<math>\pm</math>0.03 (n=3068)</i><br><i>S<math>\alpha</math>(+): 1.90<math>\pm</math>0.13 (n=144)</i> |
| ATM-NCDel #1                     | 2.40 $\pm$ 0.05 (n=1182)<br><i>S<math>\alpha</math>(-): 2.34<math>\pm</math>0.06 (n=991)</i><br><i>S<math>\alpha</math>(+): 2.69<math>\pm</math>0.12 (n=191)</i>  |
| ATM-NCDel #2                     | 2.61 $\pm$ 0.08 (n=511)<br><i>S<math>\alpha</math>(-): 2.55<math>\pm</math>0.08 (n=421)</i><br><i>S<math>\alpha</math>(+): 2.86<math>\pm</math>0.19 (n=90)</i>    |
| 53BP1 <sup>-/-</sup> -NCDel #1   | 2.80 $\pm$ 0.05 (n=976)<br><i>S<math>\alpha</math>(-): 2.70<math>\pm</math>0.07 (n=645)</i><br><i>S<math>\alpha</math>(+): 2.99<math>\pm</math>0.09 (n=331)</i>   |
| 53BP1 <sup>-/-</sup> -NCDel #2   | 2.81 $\pm$ 0.05 (n=835)<br><i>S<math>\alpha</math>(-): 2.77<math>\pm</math>0.07 (n=535)</i><br><i>S<math>\alpha</math>(+): 2.87<math>\pm</math>0.09 (n=300)</i>   |
| Ligase4 <sup>-/-</sup> -NCDel #1 | 2.81 $\pm$ 0.06 (n=667)<br><i>S<math>\alpha</math>(-): 2.81<math>\pm</math>0.06 (n=559)</i><br><i>S<math>\alpha</math>(+): 2.83<math>\pm</math>0.14 (n=108)</i>   |
| Ligase4 <sup>-/-</sup> -NCDel #2 | 2.69 $\pm$ 0.02 (n=5272)<br><i>S<math>\alpha</math>(-): 2.65<math>\pm</math>0.02 (n=4356)</i><br><i>S<math>\alpha</math>(+): 2.89<math>\pm</math>0.05 (n=916)</i> |

**Table S6 Statistical comparison for orientation bias in S $\alpha$  junctions from CH12F3 cells with various genotypes**

|            | WT #1   | WT #2   | ATM #1 | ATM #2 | 53BP1 #1 | 53BP1 #2 | Ligase4 #1 | Ligase4 #2 |
|------------|---------|---------|--------|--------|----------|----------|------------|------------|
| WT#1       |         |         |        |        |          |          |            |            |
| WT #2      |         | N/A     |        |        |          |          |            |            |
| ATM #1     | 0.0005  | 0.001   |        |        |          |          |            |            |
| ATM #2     | <0.0001 | 0.0001  | N/A    |        |          |          |            |            |
| 53BP1 #1   | <0.0001 | <0.0001 | 0.0006 | 0.0006 |          |          |            |            |
| 53BP1 #2   | <0.0001 | <0.0001 | 0.0002 | 0.0002 | N/A      |          |            |            |
| Ligase4 #1 | 0.0012  | 0.0019  | N/A    | N/A    | 0.0015   | 0.0006   |            |            |
| Ligase4 #2 | <0.0001 | <0.0001 | N/A    | N/A    | 0.0005   | 0.0002   | N/A        |            |



**Table S7 Statistical comparison for resection in *Sa* junctions from CH12F3 cells with various genotypes**

|            | WT #1   | WT #2   | ATM #1 | ATM #2 | 53BP1 #1 | 53BP1 #2 | Ligase4 #1 | Ligase4 #2 |
|------------|---------|---------|--------|--------|----------|----------|------------|------------|
| WT #1      |         |         |        |        |          |          |            |            |
| WT #2      | N/A     |         |        |        |          |          |            |            |
| ATM #1     | 0.0214  | 0.0262  |        |        |          |          |            |            |
| ATM #2     | 0.0184  | 0.0215  | N/A    |        |          |          |            |            |
| 53BP1 #1   | 0.0001  | 0.0001  | 0.0031 | 0.0163 |          |          |            |            |
| 53BP1 #2   | <0.0001 | <0.0001 | 0.0062 | 0.0270 | N/A      |          |            |            |
| Ligase4 #1 | <0.0001 | <0.0001 | N/A    | N/A    | 0.0015   | 0.0061   |            |            |
| Ligase4 #2 | <0.0001 | <0.0001 | 0.0262 | N/A    | 0.0037   | 0.016    | 0.0014     |            |

**Table S8 Summary of MH length in S $\mu$ , S $\alpha$  and genome-wide translocations with c-myc bait from CH12F3 cells with various genotypes**

| Genotype                      | genome-wide translocations | core S $\mu$ translocations | core S $\alpha$ translocations |
|-------------------------------|----------------------------|-----------------------------|--------------------------------|
| WT (T)                        | 1.70 $\pm$ 0.02 (n=12576)  | 1.38 $\pm$ 0.04 (n=1519)    | 1.32 $\pm$ 0.04 (n=1135)       |
| (-)                           | 1.68 $\pm$ 0.02 (n=6464)   | 1.66 $\pm$ 0.06 (n=768)     | 1.51 $\pm$ 0.07 (n=452)        |
| (+)                           | 1.71 $\pm$ 0.03 (n=6212)   | 1.09 $\pm$ 0.05 (n=751)     | 1.17 $\pm$ 0.05 (n=683)        |
| ATM <sup>-/-</sup> #1 (T)     | 1.83 $\pm$ 0.02 (n=23520)  | 2.02 $\pm$ 0.05 (n=968)     | 1.80 $\pm$ 0.03 (n=1070)       |
| (-)                           | 1.84 $\pm$ 0.02 (n=11996)  | 2.02 $\pm$ 0.08 (n=515)     | 2.24 $\pm$ 0.07 (n=537)        |
| (+)                           | 1.82 $\pm$ 0.02 (n=11524)  | 2.01 $\pm$ 0.07 (n=453)     | 1.88 $\pm$ 0.07 (n=533)        |
| ATM <sup>-/-</sup> #2 (T)     | 1.90 $\pm$ 0.01 (n=28291)  | 1.98 $\pm$ 0.06 (n=916)     | 2.02 $\pm$ 0.06 (n=820)        |
| (-)                           | 1.90 $\pm$ 0.02 (n=14527)  | 1.84 $\pm$ 0.08 (n=522)     | 2.24 $\pm$ 0.09 (n=397)        |
| (+)                           | 1.90 $\pm$ 0.02 (n=13764)  | 2.15 $\pm$ 0.09 (n=394)     | 1.82 $\pm$ 0.07 (n=423)        |
| 53BP1 <sup>-/-</sup> #1 (T)   | 2.28 $\pm$ 0.02 (n=15136)  | 2.68 $\pm$ 0.07 (n=526)     | 2.85 $\pm$ 0.06 (n=585)        |
| (-)                           | 2.28 $\pm$ 0.02 (n=7628)   | 2.68 $\pm$ 0.11 (n=247)     | 2.98 $\pm$ 0.09 (n=318)        |
| (+)                           | 2.28 $\pm$ 0.02 (n=7508)   | 2.68 $\pm$ 0.10 (n=279)     | 2.69 $\pm$ 0.09 (n=267)        |
| 53BP1 <sup>-/-</sup> #2 (T)   | 2.43 $\pm$ 0.01 (n=27103)  | 2.62 $\pm$ 0.04 (n=1754)    | 2.68 $\pm$ 0.03 (n=2146)       |
| (-)                           | 2.42 $\pm$ 0.02 (n=13845)  | 2.75 $\pm$ 0.06 (n=738)     | 2.82 $\pm$ 0.05 (n=1159)       |
| (+)                           | 2.43 $\pm$ 0.02 (n=13258)  | 2.53 $\pm$ 0.05 (n=1016)    | 2.52 $\pm$ 0.05 (n=987)        |
| Ligase4 <sup>-/-</sup> #1 (T) | 2.36 $\pm$ 0.01 (n=19016)  | 2.91 $\pm$ 0.05 (n=1128)    | 2.80 $\pm$ 0.05 (n=908)        |
| (-)                           | 2.36 $\pm$ 0.02 (n=9705)   | 3.02 $\pm$ 0.07 (n=439)     | 2.95 $\pm$ 0.07 (n=541)        |
| (+)                           | 2.36 $\pm$ 0.02 (n=9311)   | 2.83 $\pm$ 0.06 (n=689)     | 2.55 $\pm$ 0.07 (n=367)        |
| Ligase4 <sup>-/-</sup> #2 (T) | 2.56 $\pm$ 0.01 (n=31505)  | 2.80 $\pm$ 0.03 (n=2965)    | 2.77 $\pm$ 0.04 (n=2384)       |
| (-)                           | 2.56 $\pm$ 0.01 (n=16274)  | 2.97 $\pm$ 0.05 (n=1186)    | 2.94 $\pm$ 0.04 (n=1346)       |
| (+)                           | 2.57 $\pm$ 0.01 (n=15231)  | 2.69 $\pm$ 0.04 (n=1779)    | 2.49 $\pm$ 0.04 (n=1037)       |

**Table S9 Summary for junctions analyzed in each experiment replicate in S $\mu$ , S $\alpha$  and genome-wide translocations from CH12F3 cells with various genotypes**

| Genotype                        | genome-wide translocations |                               | core S $\mu$ translocations |                              | core S $\alpha$ translocations |                              |
|---------------------------------|----------------------------|-------------------------------|-----------------------------|------------------------------|--------------------------------|------------------------------|
|                                 | #                          | % direct joins/ MH $\geq$ 4bp | #                           | % direct joins/MH $\geq$ 4bp | #                              | % direct joins/MH $\geq$ 4bp |
| <b>WT</b>                       |                            |                               |                             |                              |                                |                              |
| Exp 1                           | 4381                       | 27.6/12.2                     | 528                         | 41.5/11.4                    | 349                            | 37.0/7.7                     |
| Exp 2                           | 4233                       | 28.1/11.7                     | 503                         | 34.4/11.7                    | 409                            | 35.2/7.8                     |
| Exp 3                           | 3962                       | 31.4/10.7                     | 488                         | 34.0/12.3                    | 377                            | 31.8/7.2                     |
| <b>ATM<sup>-/-</sup> #1</b>     |                            |                               |                             |                              |                                |                              |
| Exp 1                           | 5979                       | 28.7/14.2                     | 273                         | 28.6/23.1                    | 303                            | 25.1/19.5                    |
| Exp 2                           | 7101                       | 30.0/14.3                     | 301                         | 27.2/18.9                    | 295                            | 24.4/19.3                    |
| Exp 3                           | 10440                      | 30.0/13.4                     | 394                         | 27.2/21.1                    | 472                            | 23.5/18.6                    |
| <b>ATM<sup>-/-</sup> #2</b>     |                            |                               |                             |                              |                                |                              |
| Exp 1                           | 8687                       | 28.0/16.0                     | 265                         | 27.5/24.5                    | 231                            | 22.5/20.8                    |
| Exp 2                           | 11056                      | 28.1/15.5                     | 370                         | 28.1/20.8                    | 311                            | 27.3/18.3                    |
| Exp 3                           | 8548                       | 29.7/13.6                     | 281                         | 29.9/21.4                    | 278                            | 26.3/18.7                    |
| <b>53BP1<sup>-/-</sup> #1</b>   |                            |                               |                             |                              |                                |                              |
| Exp 1                           | 6352                       | 17.8/19.3                     | 198                         | 13.1/29.3                    | 220                            | 7.3/31.4                     |
| Exp 2                           | 4398                       | 17.7/18.9                     | 186                         | 10.8/33.9                    | 194                            | 7.7/30.4                     |
| Exp 3                           | 4386                       | 18.9/19.1                     | 142                         | 12.7/32.4                    | 171                            | 6.4/29.8                     |
| <b>53BP1<sup>-/-</sup> #2</b>   |                            |                               |                             |                              |                                |                              |
| Exp 1                           | 8631                       | 14.7/20.9                     | 532                         | 10.5/26.3                    | 640                            | 5.3/28.75                    |
| Exp 2                           | 10356                      | 14.1/21.2                     | 660                         | 12.0/31.4                    | 830                            | 8.2/24.0                     |
| Exp 3                           | 8116                       | 14.3/20.3                     | 562                         | 11.2/29.2                    | 676                            | 7.0/22.9                     |
| <b>Ligase4<sup>-/-</sup> #1</b> |                            |                               |                             |                              |                                |                              |
| Exp 1                           | 6160                       | 12.5/19.4                     | 387                         | 7.5/36.4                     | 310                            | 6.5/32.6                     |
| Exp 2                           | 5913                       | 14.3/18.5                     | 335                         | 9.0/32.5                     | 271                            | 4.8/31.4                     |
| Exp 3                           | 6943                       | 12.8/20.1                     | 406                         | 5.7/36.2                     | 327                            | 6.4/27.5                     |
| <b>Ligase4<sup>-/-</sup> #2</b> |                            |                               |                             |                              |                                |                              |
| Exp 1                           | 9273                       | 10.6/22.3                     | 828                         | 9.3/35.4                     | 701                            | 6.0/29.2                     |
| Exp 2                           | 9783                       | 10.7/23.1                     | 935                         | 9.1/33.6                     | 780                            | 6.7/30.9                     |
| Exp 3                           | 12449                      | 10.6/22.6                     | 1202                        | 8.7/34.3                     | 903                            | 6.3/27.4                     |

**Table S10 DNA oligos used in this study**

| <b>Name</b>         | <b>Sequences</b>                                                       | <b>purpose</b>                                                           |
|---------------------|------------------------------------------------------------------------|--------------------------------------------------------------------------|
| Adapter-upper       | GCGACTATAGGGCACGCGTGGNNNNNN<br>/3AmMO/<br>/5Phos/CCACGCGTGCCCTATAGTCGC | Adaptor oligo                                                            |
| Adapter-lower       | /3AmMO/                                                                | Adaptor oligo                                                            |
| 5'-Bio-I $\mu$      | /5BiosG/CAGACCTGGGAATGTATGGT                                           | Bio-primer for I $\mu$ bait                                              |
| 5'-RED-I $\mu$      | CACACAAAGACTCTGGACCTC                                                  | Red-primer for I $\mu$ bait                                              |
| c-Myc-Bio-I $\mu$   | /5BiosG/GCCTCGGCTCTTAGCAGACTG                                          | Bio-primer for c-Myc bait                                                |
| c-Myc-RED-I $\mu$   | CCTCTGAAGCCAAGGCCGATG                                                  | Red-primer for c-Myc bait                                                |
| 53BP1-Cas9-1        | G TTCCTTCCCAATTCCCACC                                                  | gRNA for generating 53BP1-<br>/- CH12F3 cells                            |
| 53BP1-Cas9-2        | G CCTTACCCAGTTCCCGAGG                                                  | gRNA for generating 53BP1-<br>/- CH12F3 cells                            |
| 53BP1-Cas9-3        | G GCACTGTTTCTCCAGCTCA                                                  | gRNA for generating 53BP1-<br>/- CH12F3 cells                            |
| ATM-Cas9-1          | G TCCTCAGTCGATTATCACT                                                  | gRNA for generating ATM-/<br>CH12F3 cells                                |
| ATM-Cas9-2          | T ATCTTGATAAACGAGCAGT                                                  | gRNA for generating ATM-/<br>CH12F3 cells                                |
| 3'-C $\alpha$ _Cas9 | G GAACCTAGGACTGCTGAGT                                                  | gRNA for non-productive S $\mu$ -<br>S $\alpha$ deletion in CH12F3 cells |
| JH4_Cas9            | G GAGCCGGCTGAGAGAAGTT                                                  | gRNA for non-productive S $\mu$ -<br>S $\alpha$ deletion in CH12F3 cells |
| c-Myc-Cas9          | G ACGAGCGTCACTGATAGTA                                                  | gRNA for producing c-myc<br>bait for HTGTS                               |
